# Supplementary material
Source: ML conference proceedings conference paper supplement (https://openreview.net/forum?id=YiwMpyMdPX)
Supplement: supplementary_material [file attachment]

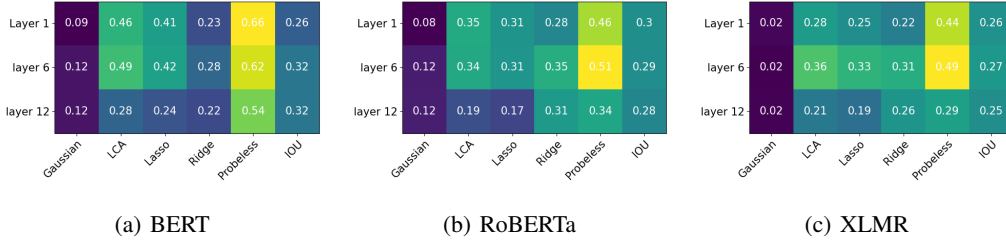Figure 2: *Task: POS*, Pairwise comparison of MeanSelect with other methods using 10–50 neurons521 **6.1 Case Study**

**Mean Select:** We propose a new corpus-based method, MeanSelect, for neuron ranking as a case-study to illustrate how researchers can use our proposed methodology. Kádár et al. (2017b) generated explanations for neurons by extracting top-N 5-gram context for each neuron based on the magnitude of their activations, followed by human annotation. Na et al. (2019) removed the human-in-the-loop by extracting concepts of various granularities from a parsed tree and aligned highly activating neurons to the concepts. Inspired by these works, we propose a novel method, MeanSelect, that generates a ranking of neurons with respect to a concept. The intuition is that a neuron learning a concept will have consistently high activations across different contexts where that concept appears. However, there may be a neuron that always activates with high value irrespective of the concept. A difference in the mean value of the neuron activating the concept and all other concepts will provide the true behavior of the neuron for the concept. Following our notation in Section 2, the score of a given neuron  $n$  is defined as follows:

$$R(n, \mathcal{C}) = \frac{\mu(\mathcal{C}) - \mu(\hat{\mathcal{C}})}{n_{max} - n_{min}} \quad (10)$$

where  $\mu(\mathcal{C})$  is the average,  $n_{max}$  is the max and  $n_{min}$  is the min of activations  $z(n, w)$  where  $w \in \mathcal{C}$ , and  $\mu(\hat{\mathcal{C}})$  is the average of activations over the random concept set.

**Compatibility Metrics** Table 5 shows the compatibility score of MeanSelect using the representation of 3 different layers and compared it with the Random selection of neurons. The high compatibility scores show that MeanSelect discovers neurons that are endorsed by other neuron interpretation methods. This serves as a measure of confidence in the proposed method. Moreover, one may observe that the method has a relatively lower score for the last layer compared to other layers, giving insight into potential improvements that can be made to the behavior of this method.

**Pairwise Comparison** The pairwise comparison of methods further provides insights into how the new method relates to other methods in terms of the resulting neurons. Figure 2 shows the heatmaps of three pre-trained models. MeanSelect has the highest overlap with the Probeless method and except Gaussian, it shows an overlap of at least 0.23 points with other methods. While the high overlap of MeanSelect with Probeless is not surprising given both are based on similar intuitions, the overlap with LCA and L1 shows that the method is selecting a diverse set of neurons captured by a variety of methods. Similar to the discussion on compatibility score, here we observe a substantial overlap drop in the last layer and this highlights the potential vulnerability of the method to certain representations.

551 **6.2 Concept Datasets**

We consider concepts from three linguistic tasks: parts of speech tags (POS, Marcus et al., 1993), semantic tags (SEM, Abzianidze et al., 2017) and syntactic chunking (Chunking) using CoNLL 2000 shared task dataset (Tjong Kim Sang & Buchholz, 2000). For the POS dataset, we used 20 concepts

Table 5: *Task: POS, Model: BERT*, Average NeuronVote score of MeanSelect using 10–50 neurons

| Layers     | BERT  |       |       | RoBERTa |       |       | XLMR  |       |       |
|------------|-------|-------|-------|---------|-------|-------|-------|-------|-------|
|            | 1     | 6     | 12    | 1       | 6     | 12    | 1     | 6     | 12    |
| Random     | 0.019 | 0.021 | 0.023 | 0.020   | 0.019 | 0.017 | 0.019 | 0.017 | 0.022 |
| MeanSelect | 0.464 | 0.476 | 0.402 | 0.392   | 0.451 | 0.328 | 0.368 | 0.408 | 0.253 |

Table 6: *Task: Semantic tagging*, Average NeuronVote compatibility scores across Semantic tagging concepts when selecting the top 10, 30, and 50 neurons from layers 1, 6 and 12. Bold numbers, underline numbers, and dashed numbers show the first, second, and third best scores respectively

| Layers    | BERT         |              |              | RoBERTa      |              |              | XLMR         |              |              |
|-----------|--------------|--------------|--------------|--------------|--------------|--------------|--------------|--------------|--------------|
|           | 1            | 6            | 12           | 1            | 6            | 12           | 1            | 6            | 12           |
| Random    | 0.018        | 0.013        | 0.017        | 0.011        | 0.026        | 0.017        | 0.026        | 0.014        | 0.026        |
| Gaussian  | 0.257        | 0.256        | 0.222        | 0.237        | 0.282        | 0.245        | 0.176        | 0.256        | 0.195        |
| LCA       | <b>0.474</b> | <b>0.541</b> | 0.385        | 0.488        | 0.493        | 0.347        | 0.309        | 0.455        | 0.367        |
| Lasso     | 0.407        | 0.492        | 0.322        | 0.391        | 0.460        | 0.328        | 0.294        | 0.396        | 0.358        |
| Ridge     | <u>0.316</u> | <u>0.343</u> | 0.361        | 0.468        | 0.492        | 0.575        | 0.372        | 0.430        | <b>0.473</b> |
| Probeless | <u>0.450</u> | <u>0.501</u> | <b>0.476</b> | <b>0.547</b> | <b>0.586</b> | <b>0.640</b> | <b>0.495</b> | <b>0.571</b> | 0.464        |
| IoU       | 0.344        | 0.332        | <u>0.380</u> | 0.288        | 0.287        | 0.242        | 0.277        | 0.262        | 0.282        |

555 which have a total dataset size of 40137. These concepts include VBG (777), VBZ (908), NNPS  
556 (204), DT (4015), TO (1177), CD (1935), JJ (2836), PRP (801), MD (463), RB (1348), VBP (534),  
557 VB (1244), NNS (3021), VBN (1082), POS (433), IN (5039), NN (6660), CC (1220), NNP (4698),  
558 and VBD (1742).

559 For the SEM dataset, we used three concepts which have a total dataset size of 120941. These  
560 concepts include IST (72240), NOW (24137) and EXS (24564). We used 10 concepts from Chunking  
561 which have a total dataset size of 220606. These concepts include B-ADJP (2493), B-ADVP (5081),  
562 B-NP (67285), B-PP (26005), B-VP (26078), I-ADJP (805), I-ADVP (532), I-NP (77368) I-PP (339)  
563 and I-VP (14620). For all the datasets used in the experiments, we use train/valid/test split 70%, 15%  
564 and 15%.

## 565 6.3 Results

### 566 6.3.1 Semantic Tagging Concepts

567 For the SEM dataset, we sample 20000 sentences for experimental validation with train/valid/test  
568 split 70%, 15% and 15%. We select three tags: IST (intersective), NOW (present tense) and EXS  
569 (untensed simple event). Table 6 presents the average NeuronVote scores across three models. We  
570 observed identical trends to that of POS i.e. Probeless is the most consistent method, LCA and Lasso  
571 are second best methods but they suffer on the last layers.

## 572 6.4 Chunking Concepts

573 Figures 3 and 4 show layer-wise results for the two voting methods proposed in the paper, across the  
574 three understudied models (BERT, RoBERTa and XLM-R). The results show that voting methods  
575 consistently rank the *Probeless* method as the most compatible in terms of neuron rankings across  
576 the layers. We are including detailed results in Tables 5–10 give detailed results with exact numbers.

Table 7: Task: *Chunking*, Average NeuronVote compatibility scores across Chunking concepts when selecting the top 10, 30, and 50 neurons from layers 1, 6 and 12. Bold numbers, underline numbers, and dashed numbers show the first, second, and third best scores respectively

| Layers    | BERT         |              |              | RoBERTa      |              |              | XLMR         |              |              |
|-----------|--------------|--------------|--------------|--------------|--------------|--------------|--------------|--------------|--------------|
|           | 1            | 6            | 12           | 1            | 6            | 12           | 1            | 6            | 12           |
| Random    | 0.018        | 0.017        | 0.023        | 0.022        | 0.018        | 0.022        | 0.023        | 0.019        | 0.014        |
| Gaussian  | 0.122        | 0.181        | 0.174        | 0.111        | 0.163        | 0.164        | 0.110        | 0.121        | 0.143        |
| LCA       | 0.395        | 0.469        | 0.300        | <u>0.440</u> | <u>0.422</u> | 0.328        | 0.336        | <u>0.447</u> | 0.388        |
| Lasso     | <u>0.396</u> | 0.472        | <u>0.301</u> | <u>0.399</u> | <u>0.395</u> | <u>0.322</u> | <u>0.366</u> | <u>0.425</u> | 0.395        |
| Ridge     | <u>0.235</u> | <u>0.255</u> | <u>0.256</u> | <u>0.303</u> | <u>0.330</u> | 0.386        | <u>0.254</u> | <u>0.289</u> | 0.410        |
| Probeless | <b>0.465</b> | <b>0.506</b> | <b>0.422</b> | <b>0.502</b> | <b>0.500</b> | <b>0.514</b> | <b>0.499</b> | <b>0.507</b> | <b>0.463</b> |
| IoU       | 0.346        | 0.361        | <u>0.321</u> | 0.285        | 0.298        | 0.244        | 0.319        | 0.283        | 0.352        |

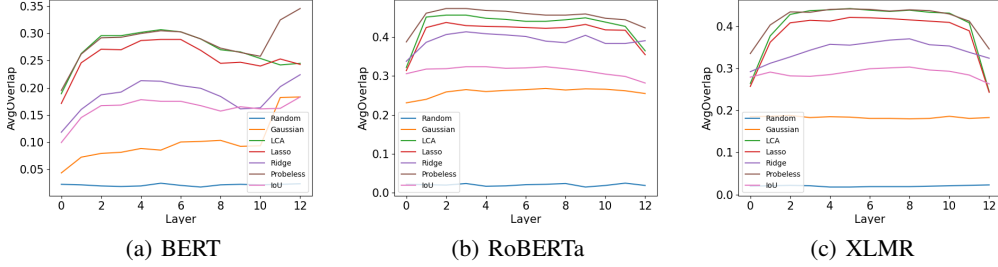

Figure 3: AvgOverlap score across different Layers in different models. All methods perform better than the baseline, Random. Probeless is the most consistent method across all models, concepts and across all layers. It is among the top methods with LCA and Lasso. However, LCA and Lasso show low score on last layers. The performance of Gaussian deteriorates significantly and is closer to Random when applied on XLMR.

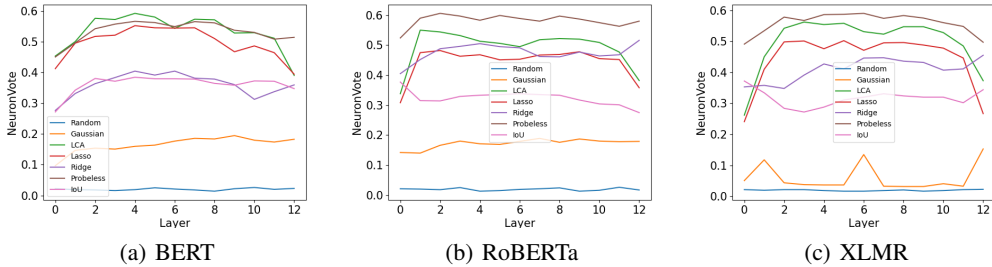

Figure 4: NeuronVote score across different Layers in different models. All methods perform better than the baseline, Random. Probeless is the most consistent method across all models, concepts and across all layers. It is among the top methods with LCA and Lasso. However, LCA and Lasso show low score on last layers.

Table 8: This is an extension of Table.4. Average AvgOverlap compatibility scores across concepts when selecting the top 10, 30, and 50 neurons. Bold numbers show the best scores. Probeless, LCA are the top performing methods. However, Probeless is most consistent performing method. LCA drops substantially for the last layers.

| Layers    | BERT         |              |              |              |              |              |              |              |              |              |              |              |              |
|-----------|--------------|--------------|--------------|--------------|--------------|--------------|--------------|--------------|--------------|--------------|--------------|--------------|--------------|
|           | 0            | 1            | 2            | 3            | 4            | 5            | 6            | 7            | 8            | 9            | 10           | 11           | 12           |
| Random    | 0.022        | 0.021        | 0.019        | 0.018        | 0.019        | 0.024        | 0.020        | 0.017        | 0.021        | 0.022        | 0.021        | 0.022        | 0.023        |
| Gaussian  | 0.043        | 0.072        | 0.079        | 0.081        | 0.088        | 0.085        | 0.100        | 0.101        | 0.103        | 0.092        | 0.093        | 0.182        | 0.183        |
| LCA       | 0.189        | <b>0.263</b> | <b>0.296</b> | <b>0.296</b> | <b>0.302</b> | <b>0.307</b> | <b>0.303</b> | <b>0.290</b> | 0.27         | <b>0.266</b> | 0.254        | 0.242        | 0.245        |
| Lasso     | 0.171        | 0.246        | 0.271        | 0.270        | 0.287        | 0.289        | 0.289        | 0.269        | 0.245        | 0.247        | 0.24         | 0.253        | 0.243        |
| Ridge     | 0.118        | 0.16         | 0.187        | 0.192        | 0.213        | 0.212        | 0.204        | 0.199        | 0.184        | 0.161        | 0.163        | 0.202        | 0.224        |
| Probeless | <b>0.195</b> | 0.262        | 0.292        | 0.293        | 0.3          | 0.305        | <b>0.303</b> | <b>0.29</b>  | <b>0.273</b> | <b>0.265</b> | <b>0.258</b> | <b>0.325</b> | <b>0.346</b> |
| IoU       | 0.099        | 0.145        | 0.167        | 0.168        | 0.178        | 0.175        | 0.175        | 0.167        | 0.157        | 0.165        | 0.161        | 0.162        | 0.183        |

Table 9: This is an extension of Table.4. Average NeuronVote compatibility scores across concepts when selecting the top 10, 30, and 50 neurons.

| Layers    | BERT         |              |              |              |              |              |              |              |              |              |              |              |       |
|-----------|--------------|--------------|--------------|--------------|--------------|--------------|--------------|--------------|--------------|--------------|--------------|--------------|-------|
|           | 0            | 1            | 2            | 3            | 4            | 5            | 6            | 7            | 8            | 9            | 10           | 11           | 12    |
| Random    | 0.022        | 0.019        | 0.018        | 0.016        | 0.019        | 0.025        | 0.021        | 0.018        | 0.014        | 0.022        | 0.026        | 0.020        | 0.023 |
| Gaussian  | 0.097        | 0.147        | 0.154        | 0.151        | 0.160        | 0.164        | 0.177        | 0.186        | 0.184        | 0.195        | 0.180        | 0.174        | 0.183 |
| LCA       | <b>0.454</b> | <b>0.501</b> | <b>0.577</b> | <b>0.573</b> | <b>0.593</b> | <b>0.581</b> | 0.544        | <b>0.574</b> | <b>0.572</b> | 0.529        | <b>0.530</b> | <b>0.512</b> | 0.391 |
| Lasso     | 0.413        | 0.496        | 0.518        | 0.522        | 0.553        | 0.546        | 0.545        | 0.546        | 0.511        | 0.468        | 0.487        | 0.465        | 0.395 |
| Ridge     | 0.277        | 0.332        | 0.364        | 0.384        | 0.405        | 0.392        | 0.405        | 0.382        | 0.379        | 0.361        | 0.313        | 0.338        | 0.360 |
| Probeless | 0.451        | 0.497        | 0.543        | 0.558        | 0.567        | 0.563        | <b>0.550</b> | 0.566        | 0.562        | <b>0.538</b> | <b>0.531</b> | 0.509        | 0.515 |
| IoU       | 0.272        | 0.343        | 0.381        | 0.372        | 0.385        | 0.380        | 0.380        | 0.379        | 0.365        | 0.359        | 0.373        | 0.372        | 0.348 |

Table 10: This is an extension of Table.4. Average AvgOverlap compatibility scores across concepts when selecting the top 10, 30, and 50 neurons.

| Layers    | RoBERTa      |              |              |              |              |              |              |              |              |              |              |              |              |
|-----------|--------------|--------------|--------------|--------------|--------------|--------------|--------------|--------------|--------------|--------------|--------------|--------------|--------------|
|           | 0            | 1            | 2            | 3            | 4            | 5            | 6            | 7            | 8            | 9            | 10           | 11           | 12           |
| Random    | 0.021        | 0.020        | 0.019        | 0.023        | 0.016        | 0.017        | 0.020        | 0.021        | 0.023        | 0.014        | 0.018        | 0.024        | 0.018        |
| Gaussian  | 0.231        | 0.240        | 0.259        | 0.265        | 0.260        | 0.263        | 0.265        | 0.268        | 0.264        | 0.267        | 0.266        | 0.262        | 0.255        |
| LCA       | 0.322        | 0.452        | 0.457        | 0.457        | 0.449        | 0.446        | 0.441        | 0.441        | 0.445        | 0.450        | 0.439        | 0.428        | 0.365        |
| Lasso     | 0.314        | 0.425        | 0.438        | 0.430        | 0.428        | 0.427        | 0.425        | 0.423        | 0.425        | 0.433        | 0.419        | 0.418        | 0.355        |
| Ridge     | 0.338        | 0.387        | 0.407        | 0.414        | 0.409        | 0.406        | 0.402        | 0.390        | 0.386        | 0.405        | 0.384        | 0.384        | 0.391        |
| Probeless | <b>0.388</b> | <b>0.462</b> | <b>0.474</b> | <b>0.474</b> | <b>0.469</b> | <b>0.467</b> | <b>0.461</b> | <b>0.457</b> | <b>0.457</b> | <b>0.460</b> | <b>0.449</b> | <b>0.445</b> | <b>0.424</b> |
| IoU       | 0.306        | 0.318        | 0.319        | 0.324        | 0.324        | 0.320        | 0.321        | 0.324        | 0.319        | 0.313        | 0.305        | 0.299        | 0.282        |

Table 11: This is an extension of Table.4. Average NeuronVote compatibility scores across concepts when selecting the top 10, 30, and 50 neurons.

|           | RoBERTa      |              |              |              |              |              |              |              |              |              |              |              |              |
|-----------|--------------|--------------|--------------|--------------|--------------|--------------|--------------|--------------|--------------|--------------|--------------|--------------|--------------|
| Layers    | 0            | 1            | 2            | 3            | 4            | 5            | 6            | 7            | 8            | 9            | 10           | 11           | 12           |
| Random    | 0.021        | 0.020        | 0.018        | 0.025        | 0.013        | 0.015        | 0.019        | 0.021        | 0.024        | 0.013        | 0.016        | 0.026        | 0.017        |
| Gaussian  | 0.142        | 0.140        | 0.166        | 0.180        | 0.171        | 0.169        | 0.179        | 0.189        | 0.176        | 0.187        | 0.180        | 0.178        | 0.179        |
| LCA       | 0.338        | 0.550        | 0.544        | 0.532        | 0.513        | 0.506        | 0.495        | 0.518        | 0.522        | 0.520        | 0.509        | 0.477        | 0.382        |
| Lasso     | 0.308        | 0.475        | 0.482        | 0.463        | 0.468        | 0.451        | 0.453        | 0.467        | 0.469        | 0.478        | 0.455        | 0.452        | 0.358        |
| Ridge     | 0.405        | 0.452        | 0.488        | 0.496        | 0.505        | 0.495        | 0.491        | 0.462        | 0.461        | 0.477        | 0.464        | 0.468        | 0.516        |
| Probeless | <b>0.524</b> | <b>0.590</b> | <b>0.606</b> | <b>0.597</b> | <b>0.583</b> | <b>0.599</b> | <b>0.589</b> | <b>0.580</b> | <b>0.597</b> | <b>0.587</b> | <b>0.575</b> | <b>0.563</b> | <b>0.580</b> |
| IoU       | 0.377        | 0.315        | 0.314        | 0.329        | 0.333        | 0.335        | 0.338        | 0.335        | 0.333        | 0.317        | 0.304        | 0.301        | 0.275        |

Table 12: This is an extension of Table.4. Average AvgOverlap compatibility scores across concepts when selecting the top 10, 30, and 50 neurons.

|           | XLMR         |              |              |              |              |              |              |              |              |              |              |              |              |
|-----------|--------------|--------------|--------------|--------------|--------------|--------------|--------------|--------------|--------------|--------------|--------------|--------------|--------------|
| Layers    | 0            | 1            | 2            | 3            | 4            | 5            | 6            | 7            | 8            | 9            | 10           | 11           | 12           |
| Random    | 0.020        | 0.021        | 0.022        | 0.021        | 0.018        | 0.018        | 0.019        | 0.019        | 0.019        | 0.020        | 0.021        | 0.022        | 0.023        |
| Gaussian  | 0.185        | 0.186        | 0.188        | 0.183        | 0.185        | 0.184        | 0.181        | 0.181        | 0.180        | 0.181        | 0.186        | 0.181        | 0.183        |
| LCA       | 0.264        | 0.377        | 0.428        | <b>0.437</b> | <b>0.439</b> | <b>0.442</b> | 0.438        | <b>0.435</b> | <b>0.438</b> | 0.433        | <b>0.431</b> | 0.408        | 0.245        |
| Lasso     | 0.257        | 0.362        | 0.408        | 0.414        | 0.412        | 0.421        | 0.420        | 0.418        | 0.415        | 0.412        | 0.409        | 0.389        | 0.243        |
| Ridge     | 0.292        | 0.312        | 0.327        | 0.343        | 0.357        | 0.355        | 0.361        | 0.367        | 0.370        | 0.356        | 0.353        | 0.338        | 0.324        |
| Probeless | <b>0.335</b> | <b>0.403</b> | <b>0.434</b> | 0.433        | <b>0.440</b> | <b>0.441</b> | <b>0.440</b> | <b>0.436</b> | <b>0.439</b> | <b>0.437</b> | 0.429        | <b>0.412</b> | <b>0.346</b> |
| IoU       | 0.279        | 0.291        | 0.282        | 0.281        | 0.285        | 0.292        | 0.299        | 0.301        | 0.303        | 0.296        | 0.293        | 0.284        | 0.263        |

Table 13: This is an extension of Table.4. Average NeuronVote compatibility scores across concepts when selecting the top 10, 30, and 50 neurons.

| Layers    | XLMR         |              |              |              |              |              |              |              |              |              |              |              |              |
|-----------|--------------|--------------|--------------|--------------|--------------|--------------|--------------|--------------|--------------|--------------|--------------|--------------|--------------|
|           | 0            | 1            | 2            | 3            | 4            | 5            | 6            | 7            | 8            | 9            | 10           | 11           | 12           |
| Random    | 0.022        | 0.020        | 0.022        | 0.022        | 0.019        | 0.017        | 0.017        | 0.019        | 0.021        | 0.017        | 0.019        | 0.022        | 0.023        |
| Gaussian  | 0.051        | 0.118        | 0.044        | 0.038        | 0.037        | 0.037        | 0.135        | 0.033        | 0.032        | 0.032        | 0.041        | 0.033        | 0.153        |
| LCA       | 0.262        | 0.450        | 0.542        | 0.562        | 0.554        | 0.558        | 0.531        | 0.523        | 0.547        | 0.547        | 0.528        | 0.485        | 0.373        |
| Lasso     | 0.241        | 0.410        | 0.498        | 0.501        | 0.476        | 0.502        | 0.471        | 0.495        | 0.496        | 0.488        | 0.478        | 0.446        | 0.267        |
| Ridge     | 0.353        | 0.358        | 0.348        | 0.391        | 0.427        | 0.411        | 0.446        | 0.447        | 0.436        | 0.432        | 0.407        | 0.411        | 0.455        |
| Probeless | <b>0.491</b> | <b>0.534</b> | <b>0.578</b> | <b>0.567</b> | <b>0.586</b> | <b>0.587</b> | <b>0.590</b> | <b>0.574</b> | <b>0.583</b> | <b>0.575</b> | <b>0.560</b> | <b>0.548</b> | <b>0.497</b> |
| IoU       | 0.372        | 0.334        | 0.284        | 0.272        | 0.288        | 0.311        | 0.320        | 0.331        | 0.324        | 0.320        | 0.320        | 0.302        | 0.344        |

Table 14: This is an extension of Table.5. Average AvgOverlap score of MeanSelect when selecting 10, 30, and 50 neurons for all layers

| Layers     | 0       | 1     | 2     | 3     | 4     | 5     | 6     | 7     | 8     | 9     | 10    | 11    | 12    |
|------------|---------|-------|-------|-------|-------|-------|-------|-------|-------|-------|-------|-------|-------|
| Random     | BERT    |       |       |       |       |       |       |       |       |       |       |       |       |
|            | 0.022   | 0.021 | 0.019 | 0.018 | 0.019 | 0.022 | 0.020 | 0.017 | 0.021 | 0.022 | 0.021 | 0.022 | 0.023 |
| MeanSelect | 0.266   | 0.351 | 0.363 | 0.362 | 0.365 | 0.369 | 0.374 | 0.370 | 0.356 | 0.349 | 0.343 | 0.327 | 0.283 |
|            | RoBERTa |       |       |       |       |       |       |       |       |       |       |       |       |
| Random     | 0.021   | 0.020 | 0.019 | 0.023 | 0.016 | 0.017 | 0.020 | 0.021 | 0.023 | 0.014 | 0.018 | 0.024 | 0.018 |
|            | 0.252   | 0.294 | 0.307 | 0.317 | 0.326 | 0.328 | 0.323 | 0.320 | 0.314 | 0.308 | 0.283 | 0.269 | 0.239 |
| Random     | XLMR    |       |       |       |       |       |       |       |       |       |       |       |       |
|            | 0.020   | 0.021 | 0.022 | 0.021 | 0.018 | 0.018 | 0.019 | 0.019 | 0.019 | 0.020 | 0.021 | 0.022 | 0.023 |
| MeanSelect | 0.233   | 0.246 | 0.245 | 0.247 | 0.264 | 0.273 | 0.294 | 0.292 | 0.281 | 0.261 | 0.259 | 0.241 | 0.159 |

Table 15: This is an extension of Table.5. Average NeuronVote score of MeanSelect when selecting 10, 30, and 50 neurons for all layers

| Layers     | 0       | 1     | 2     | 3     | 4     | 5     | 6     | 7     | 8     | 9     | 10    | 11    | 12    |
|------------|---------|-------|-------|-------|-------|-------|-------|-------|-------|-------|-------|-------|-------|
| Random     | BERT    |       |       |       |       |       |       |       |       |       |       |       |       |
|            | 0.022   | 0.019 | 0.018 | 0.016 | 0.019 | 0.025 | 0.021 | 0.018 | 0.014 | 0.022 | 0.026 | 0.020 | 0.023 |
| MeanSelect | 0.361   | 0.476 | 0.462 | 0.458 | 0.470 | 0.468 | 0.479 | 0.488 | 0.486 | 0.463 | 0.457 | 0.432 | 0.400 |
|            | RoBERTa |       |       |       |       |       |       |       |       |       |       |       |       |
| Random     | 0.021   | 0.020 | 0.018 | 0.025 | 0.013 | 0.015 | 0.019 | 0.021 | 0.024 | 0.013 | 0.016 | 0.026 | 0.017 |
|            | 0.358   | 0.388 | 0.395 | 0.403 | 0.426 | 0.423 | 0.455 | 0.438 | 0.437 | 0.406 | 0.383 | 0.374 | 0.326 |
| Random     | XLMR    |       |       |       |       |       |       |       |       |       |       |       |       |
|            | 0.022   | 0.020 | 0.022 | 0.022 | 0.019 | 0.017 | 0.017 | 0.019 | 0.021 | 0.017 | 0.019 | 0.022 | 0.023 |
| MeanSelect | 0.376   | 0.357 | 0.356 | 0.342 | 0.364 | 0.392 | 0.414 | 0.416 | 0.400 | 0.372 | 0.381 | 0.360 | 0.243 |

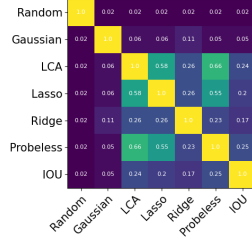

(a) Layer 1

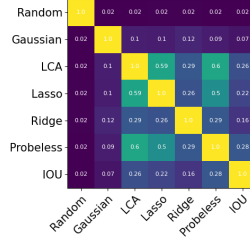

(b) Layer 2

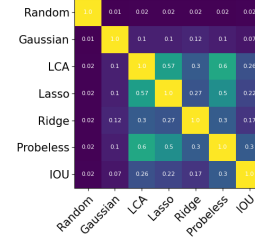

(c) Layer 3

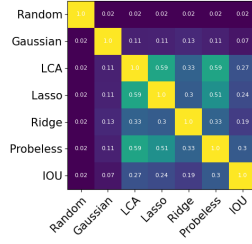

(d) Layer 4

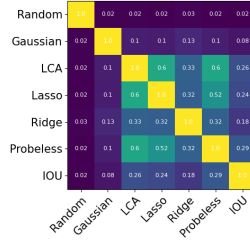

(e) Layer 5

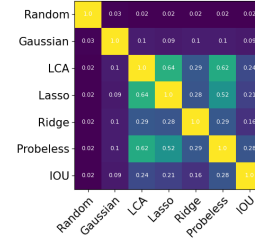

(f) Layer 6

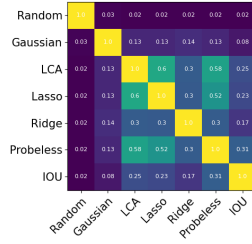

(g) Layer 7

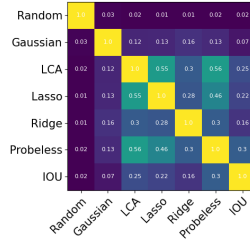

(h) Layer 8

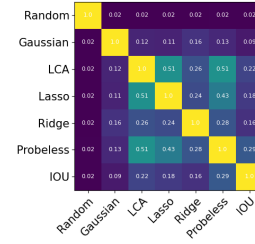

(i) Layer 9

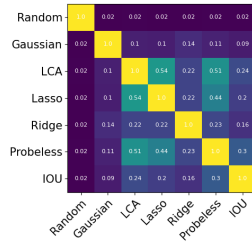

(j) Layer 10

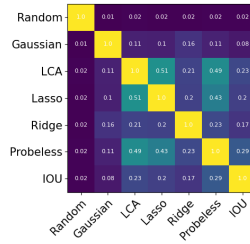

(k) Layer 11

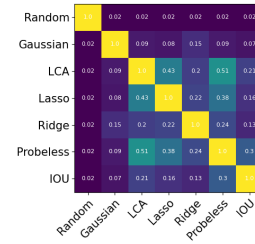

(l) Layer 12

Figure 5: This is an extension of Figure.1. Comparing average overlap of top 10-50 neurons across methods for BERT

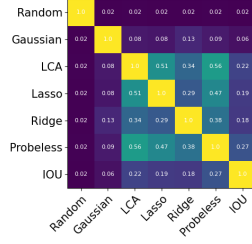

(a) Layer 1

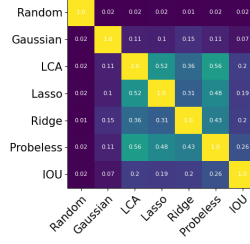

(b) Layer 2

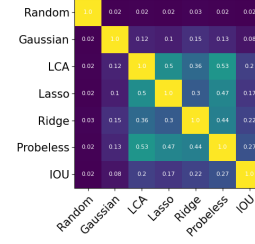

(c) Layer 3

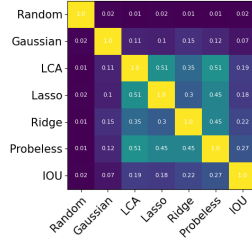

(d) Layer 4

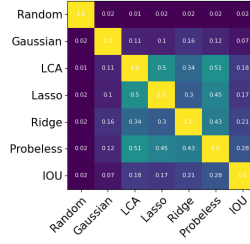

(e) Layer 5

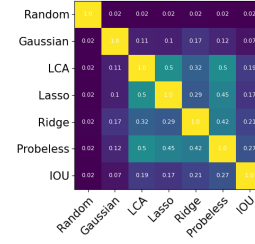

(f) Layer 6

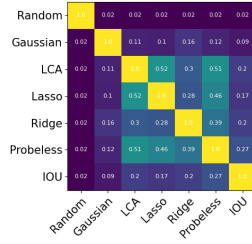

(g) Layer 7

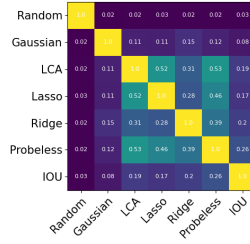

(h) Layer 8

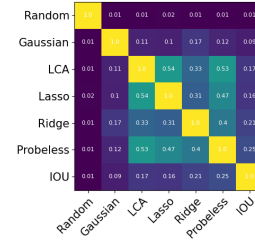

(i) Layer 9

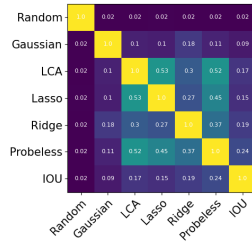

(j) Layer 10

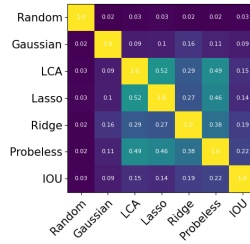

(k) Layer 11

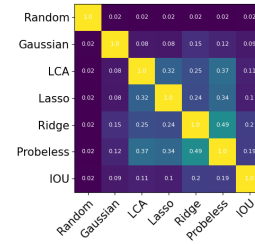

(l) Layer 12

Figure 6: This is an extension of Figure.1. Comparing average overlap of top 10-50 neurons across methods for RoBERTa

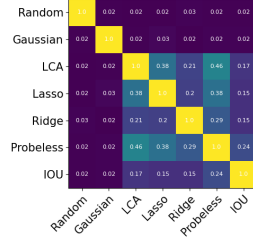

(a) Layer 1

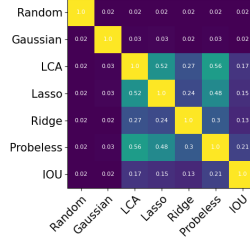

(b) Layer 2

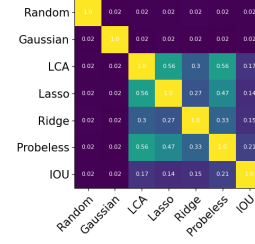

(c) Layer 3

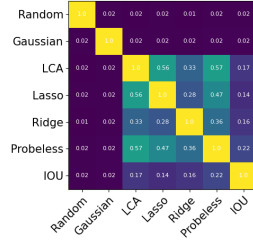

(d) Layer 4

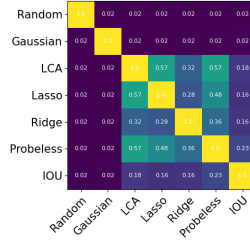

(e) Layer 5

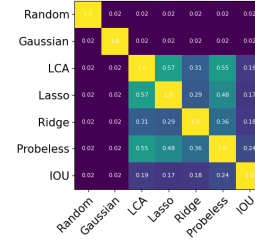

(f) Layer 6

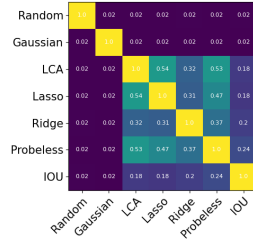

(g) Layer 7

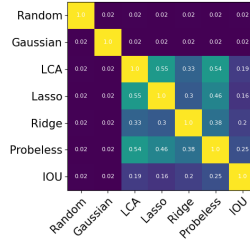

(h) Layer 8

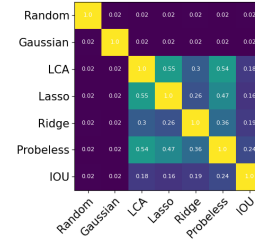

(i) Layer 9

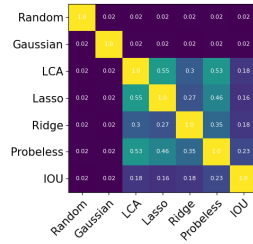

(j) Layer 10

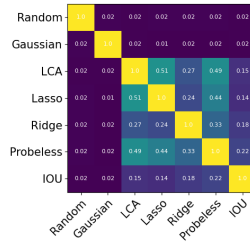

(k) Layer 11

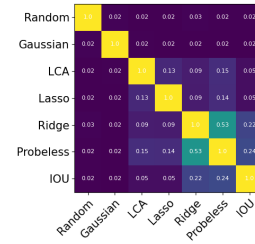

(l) Layer 12

Figure 7: This is an extension of Figure.1. Comparing average overlap of top 10-50 neurons across methods for XLMR
